# Supplementary material for: Utilization of Noncontrast Magnetic Resonance Lymphangiography for Selection of Effective Surgical Method in Breast Cancer-Related Lymphedema
Source: MDPI journal article supplement (doi:10.3390/medicina59091656), 2023-09-14
Supplement: s1 [file s1]

Tables

| Table S1. Demographics        |       |     |
|-------------------------------|-------|-----|
| n                             |       |     |
| Patient number                | 138   |     |
| Age (years)                   | 51.3  |     |
| BMI (cm/m <sup>2</sup> )      | 24.78 |     |
| History of lymphedema (years) | 4.2   |     |
| Previous lymph node surgery   | ALND  | 107 |
|                               | SLND  | 31  |
| MRI stage                     | 1     | 26  |
|                               | 2     | 62  |
|                               | 3     | 50  |

Table S2. Outcomes Stratified by Operation Types and MRI Stages

| Operation Type    | n (%)      | Preop.<br>Volume<br>Ratio | Postop.<br>Volume<br>Ratio | Volume<br>Ratio<br>Difference | Preop.<br>BIA | Postop.<br>BIA | BIA<br>Difference | Preop.<br>Lymph<br>Q | Postop.<br>Lymph<br>Q | Lymph Q.<br>Difference |
|-------------------|------------|---------------------------|----------------------------|-------------------------------|---------------|----------------|-------------------|----------------------|-----------------------|------------------------|
| LVA               | 83         |                           |                            |                               |               |                |                   |                      |                       |                        |
| MRI Stage 1       | 26 (31.3%) | 1.075                     | 1.047                      | -0.028                        | 1.055         | 1.035          | -0.020            | 50.5                 | 41.6                  | -8.9                   |
| MRI Stage 2       | 40 (48.2%) | 1.182                     | 1.129                      | -0.053                        | 1.183         | 1.152          | -0.031            | 52.8                 | 46.8                  | -6                     |
| MRI Stage 3       | 17 (20.5%) | 1.288                     | 1.205                      | -0.083                        | 1.568         | 1.549          | -0.019            | 58                   | 43.8                  | -14.2                  |
| LVA + Liposuction | 27         |                           |                            |                               |               |                |                   |                      |                       |                        |
| MRI Stage 2       | 12 (44.4%) | 1.263                     | 1.1                        | -0.163                        | 1.235         | 1.181          | -0.054            | 47.3                 | 35.8                  | -11.5                  |
| MRI Stage 3       | 15 (55.6%) | 1.353                     | 1.205                      | -0.148                        | 1.619         | 1.568          | -0.05             | 47.8                 | 34.3                  | -13.5                  |
| LVA + VLNT        | 28         |                           |                            |                               |               |                |                   |                      |                       |                        |
| MRI Stage 2       | 10 (35.7%) | 1.19                      | 1.129                      | -0.061                        | 1.234         | 1.132          | 0.102             | -57.5                | 39.3                  | -18.2                  |
| MRI Stage 3       | 18 (64.2%) | 1.277                     | 1.198                      | -0.079                        | 1.676         | 1.614          | 0.062             | -65.5                | 45.7                  | -19.8                  |

\* LVA - lymphaticovenular anastomosis / VLNT - vascularized lymphnode transfer / BIA - Bioelectrical impedance analysis
